# Supplementary material for: Facile one-pot synthesis of the mesoporous chitosan-coated cobalt ferrite nanozyme as an antibacterial and MRI contrast agent
Source: Royal Society of Chemistry journal article supplement (doi:10.1039/d4ra02462a), 2024-01-01
Supplement: d4ra02462a1.pdf [file d4ra02462a1.pdf]

**Facile and one-pot synthesis of mesoporous chitosan-coated cobalt ferrite nanozymes as antibacterial and MRI contrast agent**

Abolghasem Abbasi Kajani<sup>a,b,\*</sup>, Ali Pouresmaeili<sup>a</sup>, Mehdi Kamali<sup>b,c</sup>

<sup>a</sup> Department of Biotechnology, Faculty of Biological Science and Technology, University of Isfahan, Isfahan 81746-73441, Iran

<sup>b</sup> Environmental Research Institute, University of Isfahan, Isfahan, 81746-73441, Iran

<sup>c</sup> Department of Environmental Engineering, University of Tehran, Tehran, Iran

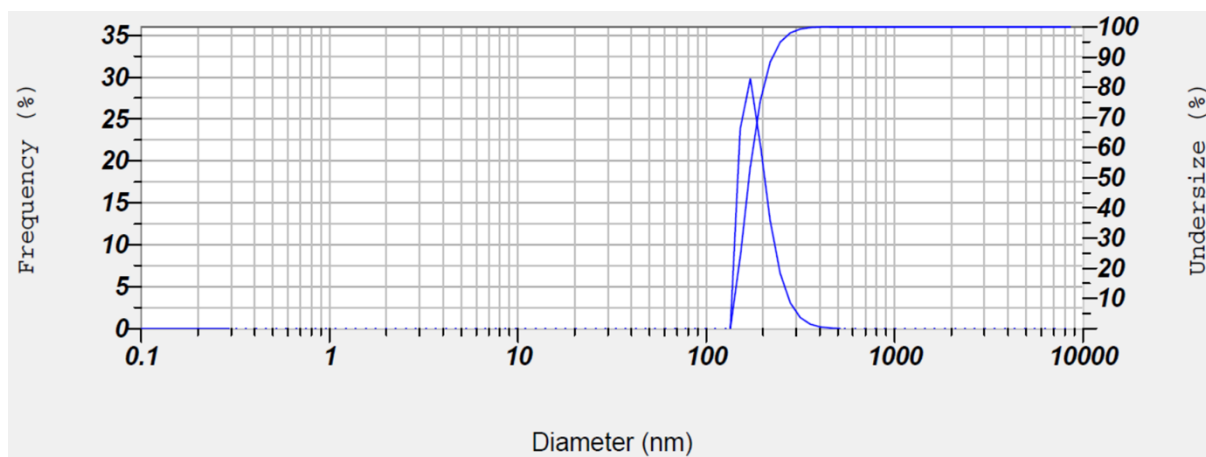

**Fig. S1.** The hydrodynamic size distribution of CoFeCH NPs.

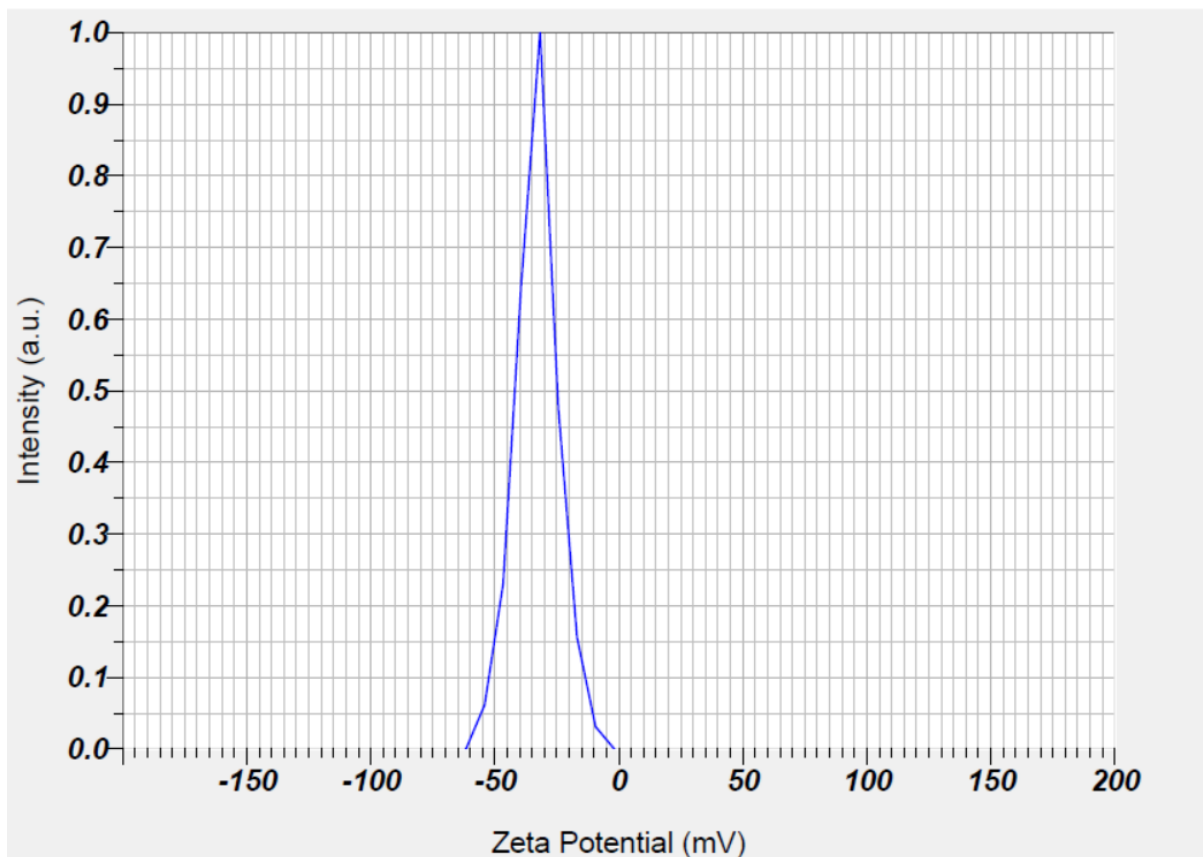

**Fig. S2.** The zeta potential value of CoFeCH NPs.

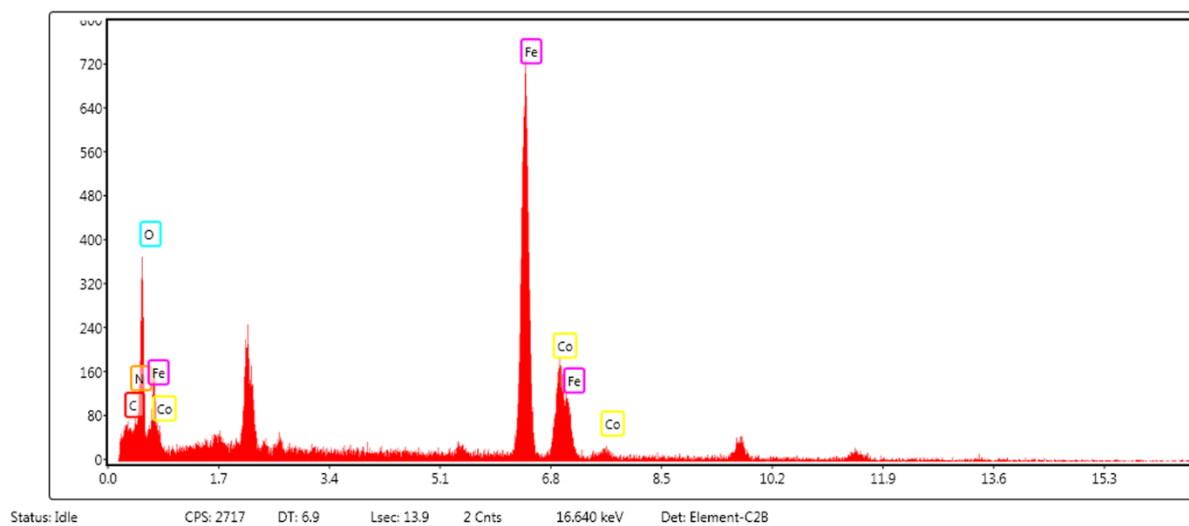

**Fig. S3.** EDS analysis of CoFeCH NPs.
